# Supplementary material
Source: Preprints.org preprint supplement (doi:10.20944/preprints202106.0547.v1)
Supplement: Supplementary file 3 [file supplementary data S1.xlsx]

## Sheet: soil chemical data
Sampling location	sampling date	Vegetation	Latitude, WGS'84	Longitude, WGS'84	Sample code	pH-H2O	EC	Salt	Corg	Humus	CaCO3
							µS/cm	%	m/m%	m/m%	m/m %
Apajpuszta	2014-06-11	Puccinelia sward	N47° 05' 08,50"	E19° 06' 07,10"	AP1	9.52	1415	0.16	0.986049	1.69995	23.1832
Apajpuszta	2014-06-11	Puccinelia sward	N47° 05' 08,50"	E19° 06' 07,10"	AP2	8.63	976	0.11	1.6279	2.8065	22.5347
Apajpuszta	2014-06-11	Puccinelia sward	N47° 05' 08,50"	E19° 06' 07,10"	AP3	8.47	1198	0.14	1.30652	2.25244	23.9938
Apajpuszta	2014-06-11	Artemisia alkali steppe	N47° 05' 09,40"	E19° 06' 02,60"	AA1	7.99	428	0.02	1.67147	2.88162	9.88932
Apajpuszta	2014-06-11	Artemisia alkali steppe	N47° 05' 09,40"	E19° 06' 02,60"	AA2	7.98	464	0.03	2.04953	3.53339	10.2136
Apajpuszta	2014-06-11	Artemisia alkali steppe	N47° 05' 09,40"	E19° 06' 02,60"	AA3	8.9	795	0.09	1.37061	2.36293	17.3468
Apajpuszta	2014-06-11	Bare spot	N47° 05' 11,60"	E19° 05' 54,40"	AL1	10.32	3250	0.41	0.516338	0.890167	22.3726
Apajpuszta	2014-06-11	Bare spot	N47° 05' 11,60"	E19° 05' 54,40"	AL2	10.24	3390	0.43	0.385676	0.664905	18.1574
Apajpuszta	2014-06-11	Bare spot	N47° 05' 11,60"	E19° 05' 54,40"	AL3	10.42	4760	0.82	0.269995	0.465471	26.2634
Apajpuszta	2014-06-11	Achillea alkali steppe	N47° 05' 11,40"	E19° 05' 53,10"	AF1	7.58	292	< 0,02	2.43446	4.19701	12.5643
Apajpuszta	2014-06-11	Achillea alkali steppe	N47° 05' 11,40"	E19° 05' 53,10"	AF2	7.11	363	< 0,02	2.76925	4.77419	17.4279
Apajpuszta	2014-06-11	Achillea alkali steppe	N47° 05' 11,40"	E19° 05' 53,10"	AF3	7.45	321	< 0,02	2.52397	4.35133	17.8332
Apajpuszta	2014-09-17	Puccinelia sward	N47° 05' 08,50"	E19° 06' 07,10"	AP1	9.52	1150	0.13	1.01	1.7385	21.3356
Apajpuszta	2014-09-17	Puccinelia sward	N47° 05' 08,50"	E19° 06' 07,10"	AP2	9.65	1165	0.13	1.08	1.85899	23.1
Apajpuszta	2014-09-17	Puccinelia sward	N47° 05' 08,50"	E19° 06' 07,10"	AP3	9.41	1200	0.14	1.14	1.96782	24.6
Apajpuszta	2014-09-17	Artemisia alkali steppe	N47° 05' 09,40"	E19° 06' 02,60"	AA1	10.09	1305	0.15	0.49	0.852026	17.9
Apajpuszta	2014-09-17	Artemisia alkali steppe	N47° 05' 09,40"	E19° 06' 02,60"	AA2	9.92	1113	0.13	0.59	1.01839	13.6
Apajpuszta	2014-09-17	Artemisia alkali steppe	N47° 05' 09,40"	E19° 06' 02,60"	AA3	9.88	706	0.08	0.68	1.1714	12
Apajpuszta	2014-09-17	Bare spot	N47° 05' 11,60"	E19° 05' 54,40"	AL1	10.37	2240	0.27	0.29	0.506357	22
Apajpuszta	2014-09-17	Bare spot	N47° 05' 11,60"	E19° 05' 54,40"	AL2	10.29	2180	0.26	0.28	0.475375	17.4
Apajpuszta	2014-09-17	Bare spot	N47° 05' 11,60"	E19° 05' 54,40"	AL3	10.4	1530	0.18	0.32	0.557322	18.1
Apajpuszta	2014-09-17	Achillea alkali steppe	N47° 05' 11,40"	E19° 05' 53,10"	AF1	8.13	267	<0,02	1.3	2.24101	13.5
Apajpuszta	2014-09-17	Achillea alkali steppe	N47° 05' 11,40"	E19° 05' 53,10"	AF2	7.79	310	<0,02	2.13	3.68053	12.4
Apajpuszta	2014-09-17	Achillea alkali steppe	N47° 05' 11,40"	E19° 05' 53,10"	AF3	8.08	275	<0,02	1.36	2.33684	11.7

## Sheet: microResp data
Sample code	sampling date	Aqua	D-Galactose	L-Arabinose	Trehalose	D-Fructose	D-Glucose	DL-Malic acid	Citric acid	L-Alanine	Succinate	L-Glutamine	L-Lysine	L-Arginine	L-Leucine	L-Glutamicacid	Protocatechuic acid
			Gal	Ara	Tre	Fru	Glc	Mal	Cit	Ala	Suc	Gln	Lys	Arg	Leu	Glu	Proc
AP1	2014-06-11	0.148548	0.242585	0.223151	0.404176	0.338226	0.491076	0.491674	0.230312	0.186025	0.289031	0.210355	0.1608	0.0816062	0.15096	0.304207	0.281055
AP2	2014-06-11	0.195844	0.939505	0.835071	1.01866	1.57084	1.68363	1.12156	0.699182	0.436091	1.15904	0.555144	0.257025	0.134448	0.250594	0.724793	0.411048
AP3	2014-06-11	0.478355	1.71688	2.02711	3.03931	2.89411	4.14175	2.24751	1.57715	0.890055	2.21635	1.26972	0.552214	0.251958	0.59713	1.54647	1.20583
AA1	2014-06-11	0.218462	2.11717	2.48399	2.06511	3.82664	4.01738	4.8948	2.18264	0.930714	1.54227	1.51206	0.478169	0.228306	0.418981	1.46464	2.38886
AA2	2014-06-11	0.245812	1.23073	1.63852	1.63211	2.53819	3.28745	3.67028	1.75237	0.724721	1.57697	1.29804	0.472041	0.240009	0.450075	1.1938	2.3413
AA3	2014-06-11	0.31693	0.798635	1.39833	1.11978	1.96958	2.82905	3.36411	1.75461	0.773716	1.74072	1.0818	0.610544	0.327036	0.518792	0.88489	1.62183
AL1	2014-06-11	0.107863	0.13943	0.140762	0.139868	0.157283	0.154477	0.693587	0.525213	0.254255	0.141087	0.212183	0.181553	0.107046	0.152331	0.176102	0.125272
AL2	2014-06-11	0.115309	0.12907	0.136636	0.134232	0.162451	0.165865	0.449964	0.35807	0.231502	0.143293	0.213214	0.172747	0.090509	0.152133	0.168323	0.121935
AL3	2014-06-11	0.103737	0.108578	0.109221	0.113832	0.117886	0.119883	0.588701	0.438897	0.211346	0.106324	0.170413	0.150375	0.091535	0.126713	0.151078	0.112658
AF1	2014-06-11	0.302298	1.48432	1.75132	1.30456	2.50384	2.83314	3.22613	1.39835	1.05763	1.39835	1.34495	0.471251	0.296676	0.499337	1.19867	0.478942
AF2	2014-06-11	0.293665	2.34936	2.33141	1.80677	3.45785	3.63075	3.56767	1.55961	0.935663	1.54367	1.3888	0.488755	0.383862	0.642452	1.44426	0.835084
AF3	2014-06-11	0.327511	1.53319	1.53635	1.44822	2.28433	2.94781	2.24994	1.25012	0.803525	1.59288	0.813662	0.464503	0.317995	0.563401	1.09217	0.768192
AP1	2014-09-17	0.161854	0.188886	0.189482	0.20476	0.210107	0.205231	0.469133	0.536678	0.295279	0.285856	0.319359	0.287096	0.190914	0.196604	0.302547	0.618681
AP2	2014-09-17	0.189641	0.269606	0.276868	0.380575	0.371705	0.483374	0.532329	0.587715	0.333593	0.457187	0.352702	0.263357	0.235924	0.239766	0.414226	0.610097
AP3	2014-09-17	0.163558	0.208534	0.223008	0.228226	0.244145	0.273038	0.302938	0.375236	0.229966	0.288888	0.229531	0.235949	0.190387	0.192619	0.226129	0.40774
AA1	2014-09-17	0.202107	0.495136	0.579683	0.452114	0.679154	0.818049	0.556729	0.389011	0.330028	0.400924	0.39546	0.27349	0.255053	0.249806	0.465562	0.560786
AA2	2014-09-17	0.172658	0.288843	0.33136	0.361466	0.417239	0.521586	0.412299	0.390604	0.336362	0.462156	0.438503	0.282579	0.26233	0.250314	0.579991	0.445765
AA3	2014-09-17	0.189126	0.403891	0.442618	0.364088	0.534974	0.61968	0.455262	0.374739	0.324374	0.394124	0.412247	0.287562	0.283427	0.268629	0.489904	0.455965
AL1	2014-09-17	0.103692	0.106195	0.112853	0.108627	0.123786	0.116709	0.161045	0.170116	0.199678	0.123633	0.18226	0.166277	0.123571	0.14861	0.166194	0.119916
AL2	2014-09-17	0.0949315	0.0974446	0.0997706	0.0998232	0.109315	0.106782	0.133573	0.137593	0.19473	0.104238	0.149399	0.146618	0.110107	0.126538	0.130568	0.10282
AL3	2014-09-17	0.114927	0.125826	0.132245	0.12187	0.139603	0.130442	0.206184	0.200818	0.22066	0.132233	0.214359	0.175914	0.139345	0.155856	0.184987	0.116393
AF1	2014-09-17	0.223818	0.740029	0.836152	0.531031	1.02305	1.08993	1.27378	0.520718	0.472427	0.585831	0.558447	0.279405	0.328349	0.294398	0.613703	0.302155
AF2	2014-09-17	0.285793	1.03086	1.14742	1.19425	1.44531	1.8984	1.27534	0.841301	0.631646	0.977999	0.805114	0.415916	0.455223	0.445962	0.975154	0.38901
AF3	2014-09-17	0.474502	1.22088	1.16381	1.4294	1.55132	1.93873	1.67456	0.94053	0.830232	1.07442	0.9766	0.519103	0.523137	0.565497	1.07376	0.626449
all data in: ug CO2-C/g soil/hour
